# Supplementary material
Source: publisher site journal article supplement (https://www.dovepress.com/get_supplementary_file.php?f=429065.docx)
Supplement: Supplementary file 1 [file get_supplementary_file.php]

**Supplement 1: Questionnaire seropositive employees**

**Internal ID no.: ________**

**Questionnaire for employees with positive SARS-CoV-2 serology.**

Dear colleagues,

Your blood test for previous contact with the new coronavirus SAR-CoV-2 has shown that your infection has expired. You are now presumably immune. We would therefore like to ask you to answer a few questions:

1. how would you describe your current state of health in general?

- Excellent
- Very good
- Good
- Less good
- Bad

2. compared to before the Corona pandemic (before February 2020), how would you describe your current health status?

- Currently much better than before
- Currently slightly better than before
- About the same as before
- Currently slightly worse than before
- Currently much worse than before

3. Do you recall a specific episode of illness since February 2020 that might fit the positive finding?

- Yes (please tick the month(s), multiple answers possible)
- February
- March
- April
- May
- June
- No (please skip straight to question No. 10, and 4 omit questions to 9)

4. If yes:

How many days did the acute illness persist (i.e., the duration of the illness)?

______ days

5. Was there a period after the acute symptoms had subsided with general

Fatigue or general weakness?

- Yes
- No

If yes: How many days did this general weakness last?

______ days

6. Does this general lassitude/weakness continue to this day?

- Yes
- No

7. What specific symptoms did you have during the acute phase of the disease

(multiple answers possible)?

- Cough
- Common cold
- Headache
- Sore throat
- Fever
- Chills
- Olfactory disorder
- Taste disorder
- Nausea
- Diarrhea
- Limb pain
- general fatigue
- Breathing problems
- Other ____________________

8. How severe was your feeling of illness during the acute phase of illness?

- Mild feeling of sickness
- Medium feeling of sickness
- Severe feeling of illness
- No feeling of sickness

9. Were they on sick leave (certificate of incapacity for work) during the acute episode of illness?

- Yes
- No

10. How do you think the contagion occurred (multiple answers possible)?

- Infection through the private environment (e.g. friends, family)
- Infection through colleagues
- Infection through patients
- I do not know

11. Since February 1, 2020, have you had contact in either of the following ways with a (different) person who is or was a confirmed Corona case?

- Yes, I had contact for at least 15 minutes at a distance of less than 1.5 meters from this person, e.g., one long conversation or several, short conversations throughout the day that together amounted to 15 minutes or more
- Yes, I had contact for at least 15 minutes with a distance that was more than 1.5 meters from this person, e.g., one long conversation or several, short conversations throughout the day that together amounted to 15 minutes or more
- No
- I do not know

12 If yes to question No.11: Did you or the other person wear a mouth-nose mask (multiple answers possible)?

- I wore a mouth and nose mask
- The other person wore a mouth-nose mask
- No

13. How did you personally feel about the result of the blood test (multiple answers possible)?

- Positive feeling
- Negative feeling
- The result has triggered fears
- Soothing
- Relieving (e.g., by already having had the disease).
- Other ____________________

14. Has the blood result changed your attitude towards work (multiple answers possible)?

- More relaxed (e.g. when dealing with colleagues or patients)
- Anger (e.g. because the infection came about through the professional environment [colleagues / patients]).
- Triggering fear
- Less fear
- No change
- Other ____________________

15. Do you believe/trust the result of the blood test?

- Yes
- No
- I am unsure

16. From today's perspective, how much do you agree with this statement?

"My own job or professional livelihood is at risk."

- Fully agree
- Agree rather
- Tend not to agree
- Do not agree at all

17. From today's perspective, how much do you agree with this statement?

"My partner's job or professional livelihood is at risk."

- Fully agree
- Agree rather
- Tend not to agree
- Do not agree at all
- I live without a partner or he/she does not work

The imposed restrictions on social contact stress people to different degrees. That's why we want to learn more about your mood, your sleep, and what these restrictions mean to you.

18. During the last two weeks, how often did you feel affected by the following complaints?

|  | Not at all | On single days | On more than half of the days | Almost every day |
| --- | --- | --- | --- | --- |
|  |  |  |  |  |
| Little interest or pleasure in your activities | O | O | O | O |
| Dejection, melancholy or hopelessness | O | O | O | O |
| Difficulty falling asleep or staying asleep through the night, or increased sleep | O | O | O | O |
| Fatigue or feeling of having no energy left | O | O | O | O |
| Decreased appetite or excessive need to eat | O | O | O | O |
| Poor opinion of self; feeling like a failure or having let family down | O | O | O | O |
| Difficulty concentrating on something, e.g. reading the newspaper or watching television | O | O | O | O |
| Were your movements or speech so slowed down that others would notice? Or, on the contrary, were you "fidgety" or restless and thus had a stronger urge to move than usual? | O | O | O | O |
| Thoughts that you would rather be dead or cause yourself suffering | O | O | O | O |

19. During the past four weeks, how often did you feel affected by the following complaints?

|  | Not at all | On single days | On more than half of the days | Almost every day |
| --- | --- | --- | --- | --- |
|  |  |  |  |  |
| Feelings of nervousness, anxiety or tension | O | O | O | O |
| Inability to stop or control worry | O | O | O | O |
| Excessive worries about various matters | O | O | O | O |
| Difficulty relaxing | O | O | O | O |
| Being so restless that sitting still is difficult | O | O | O | O |
| Quick annoyance or irritability | O | O | O | O |
| Feelings of fear, as if something terrible might happen | O | O | O | O |

20. If you think about the last four weeks, how often...

|  | Often | Sometimes | Rare | Never |
| --- | --- | --- | --- | --- |
|  |  |  |  |  |
| ...do you feel that you miss the company of others? | O | O | O | O |
| ...do you have the feeling of being left out? | O | O | O | O |
| ...do you feel socially isolated? | O | O | O | O |
|  |  |  |  |  |
|  |  |  |  |  |

21. Compared to the time before the Corona pandemic, one or more of these three feelings is...

- ...rather become stronger?
- ... rather become less?
- Does not apply to me

22. Please indicate whether you yourself are afraid of the following events.

|  | Yes | No | I do not know |
| --- | --- | --- | --- |
|  |  |  |  |
| Road traffic accident | O | O | O |
| Natural disaster (e.g. flood, lightning strike, storm) | O | O | O |
| Corona virus infection | O | O | O |
| Cancer | O | O | O |
| Stroke | O | O | O |
| Heart attack | O | O | O |
| Diabetes (diabetes mellitus) | O | O | O |
| Hereditary disease | O | O | O |

Thank you for participating and answering the questions!

Please now place the completed questionnaire in the labeled

Return envelope and send it via interoffice mail to the study team of

PD Dr. Tsianakas, or hand him the envelope personally!

**Questionnaire for Corona-positive tested employees**

**Version 1.0 from 05.06.2020, responsible PD Dr. med. Athanasios Tsianakas**

**Supplement 2: Questionnaire seronegative employees**

**Internal ID no.: ________** (filled in by the study team)

**Questionnaire for employees serologically tested for SARS-CoV-2.**

Dear colleagues,

According to the current state of scientific knowledge, your blood test did not reveal any previous contact with the new coronavirus SAR-CoV-2. With the aim of gaining further insights into the disease, we would therefore like to ask you to answer a few brief questions:

1. have you suffered from an upper respiratory infection (cold, flu, cold, cough, etc.) in the period from February 2020 to today?

- Yes (please tick the month(s), multiple answers possible)

O February O March O April O May O June

- No (please skip straight to question No. 8 and omit questions 2 through 7).

2. if yes:

How many days did the acute illness persist (i.e., the duration of the
illness)?

______ days

3. after the acute symptoms have subsided, was there still a period of general

Fatigue or general weakness?

- Yes
- No

If yes: How many days did this general weakness last?

______ days

4. does this general exhaustion/weakness last until today?

- Yes
- No

5. what specific symptoms did you have during the acute phase of the disease?

(multiple answers possible)?

| - Cough | - Common cold | - Headache | - Sore throat |
| --- | --- | --- | --- |
| - Fever | - Chills | - Olfactory disorder | - Taste disorder |
| - Nausea | - Diarrhea | - Limb pain | - General fatigue |
| - Breathing problems | - Other ______________ | |  |

6. how strong was your feeling of illness during the acute phase of the disease?

O Mild O Moderate O Severe O No feeling of illness

7. were you on sick leave (certificate of incapacity for work) during the acute episode of illness?

- Yes
- No

8. how did you personally feel about the result of the blood test (multiple answers possible)?

- Positive feeling
- Negative feeling
- The result has triggered fears
- Soothing
- Relieving (e.g., by not having had the disease).
- Other ____________________

9. has the blood result changed your attitude towards work (multiple answers possible)?

- Disappointed (because you have not had the disease and therefore are not immune).
- More relaxed (e.g. when dealing with colleagues or patients)
- Anger (e.g., that the workplace could be a source of contagion).
- Triggering fear
- Less fear
- No change
- Other ____________________

10. Do you believe/trust the result of the blood test?

- Yes
- No
- I am unsure

Thank you for participating and answering the questions!

Please now place the completed questionnaire in the labeled

Return envelope and send it, if possible within 10 days, by internal mail to the study team of PD Dr. Tsianakas, or hand the envelope to him personally!

**Questionnaire for Corona-negative tested employees**

**Version 1.0 from 05.06.2020, responsible PD Dr. med. Athanasios Tsianakas**
